# Supplementary material
Source: publisher figshare collection journal article supplement (https://frontiersin.figshare.com/ndownloader/files/28239321)
Supplement: Supplementary file [file 28239321]

# Supplementary

|                             | Cognitive training group<br>(n=55)       |                                              |            |                      | Aerobic exercise group<br>(n=63)         |                                              |            |                      | Control group<br>(n=62)                  |                                              |            |                      |
|-----------------------------|------------------------------------------|----------------------------------------------|------------|----------------------|------------------------------------------|----------------------------------------------|------------|----------------------|------------------------------------------|----------------------------------------------|------------|----------------------|
|                             | included in<br>MRI<br>analysis<br>(n=28) | not included<br>in MRI<br>analysis<br>(n=27) | $t/\chi^2$ | $p(2\text{-tailed})$ | included in<br>MRI<br>analysis<br>(n=34) | not included<br>in MRI<br>analysis<br>(n=29) | $t/\chi^2$ | $p(2\text{-tailed})$ | included in<br>MRI<br>analysis<br>(n=32) | not included<br>in MRI<br>analysis<br>(n=30) | $t/\chi^2$ | $p(2\text{-tailed})$ |
| Age, Mean±SD(year)          | 68.20±3.21                               | 68.67±2.87                                   | -0.569     | 0.572                | 69.33±2.42                               | 68.41±2.84                                   | 1.394      | 0.168                | 68.41±2.94                               | 69.20±2.99                                   | -1.048     | 0.299                |
| Male, n (%)                 | 10(35.7)                                 | 11(40.7)                                     | 0.147      | 0.701                | 12(35.3)                                 | 11(37.9)                                     | 0.047      | 0.828                | 15(46.9)                                 | 16(53.3)                                     | 0.258      | 0.611                |
| Education, years, Mean ± SD | 11.48±2.77                               | 12.41±2.79                                   | -1.234     | 0.222                | 12.52±2.88                               | 11.55±2.56                                   | 1.393      | 0.169                | 11.94±2.99                               | 12.55±2.47                                   | -0.875     | 0.385                |
| RBANS total score           | 94.32±11.61                              | 92.04±12.98                                  | 0.689      | 0.494                | 94.74±12.13                              | 91.90±12.05                                  | 0.929      | 0.357                | 93.09±12.79                              | 91.27±11.40                                  | 0.592      | 0.556                |

Table 1 Demographic characteristics and cognitive assessment for participants included and not included in MRI analysis at baseline  
RBANS=Repeatable Battery for the Assessment of Neuropsychological Status (Form A)

|                                 | Cognitive training group<br>(n=55)       |                                |            |                      | Aerobic exercise group<br>(n=63)         |                                |            |                      | Control group<br>(n=62)                  |                                |            |                      |
|---------------------------------|------------------------------------------|--------------------------------|------------|----------------------|------------------------------------------|--------------------------------|------------|----------------------|------------------------------------------|--------------------------------|------------|----------------------|
|                                 | included in<br>MRI<br>analysis<br>(n=28) | randomly<br>assigned<br>(n=55) | $t/\chi^2$ | $p(2\text{-tailed})$ | included in<br>MRI<br>analysis<br>(n=34) | randomly<br>assigned<br>(n=63) | $t/\chi^2$ | $p(2\text{-tailed})$ | included in<br>MRI<br>analysis<br>(n=32) | randomly<br>assigned<br>(n=62) | $t/\chi^2$ | $p(2\text{-tailed})$ |
| Age, Mean $\pm$ SD(year)        | 68.20 $\pm$ 3.21                         | 68.43 $\pm$ 3.03               | -0.320     | 0.750                | 69.33 $\pm$ 2.42                         | 68.91 $\pm$ 2.64               | 0.779      | 0.438                | 68.41 $\pm$ 2.94                         | 68.79 $\pm$ 2.97               | -0.593     | 0.554                |
| Male, n (%)                     | 10(35.7)                                 | 21(38.2)                       | 0.048      | 0.826                | 12(35.3)                                 | 23(36.5)                       | 0.014      | 0.905                | 15(46.9)                                 | 31(50.0)                       | 0.082      | 0.774                |
| Education, years, Mean $\pm$ SD | 11.48 $\pm$ 2.77                         | 11.94 $\pm$ 2.79               | -0.703     | 0.484                | 12.52 $\pm$ 2.88                         | 12.07 $\pm$ 2.76               | 0.744      | 0.459                | 11.94 $\pm$ 2.99                         | 12.23 $\pm$ 2.75               | -0.480     | 0.632                |
| RBANS total score               | 94.32 $\pm$ 11.61                        | 93.20 $\pm$ 12.24              | 0.401      | 0.689                | 94.74 $\pm$ 12.13                        | 93.43 $\pm$ 12.08              | 0.508      | 0.613                | 93.09 $\pm$ 12.79                        | 92.21 $\pm$ 12.07              | 0.330      | 0.742                |

Table 2 Demographic characteristics and cognitive assessment for participants included in MRI analysis and randomly assigned at baseline  
RBANS=Repeatable Battery for the Assessment of Neuropsychological Status (Form A)
